# Supplementary material for: Reconstitution of Human Necrosome Interactions in Saccharomyces cerevisiae
Source: MDPI journal article supplement (doi:10.3390/biom11020153), 2021-01-25
Supplement: s1 [file s1]

Supplementary materials

# Reconstitution of Human Necrosome Interactions in *Saccharomyces Cerevisiae*

Y. Ji, L. A. Ward and C. J. Hawkins \*

**Citation:** Y. Ji; L. A. Ward; C. J. Hawkins Reconstitution of Human Necrosome Interactions in *Saccharomyces Cerevisiae*. **2021**, *10*, 153.  
<https://doi.org/10.3390/biom11020153>

Department of Biochemistry and Genetics, La Trobe Institute for Molecular Science, La Trobe University, Bundoora, VIC, Australia; Y.Ji@latrobe.edu.au (Y.J.); L.Ward@latrobe.edu.au (L.A.W.)

\* Correspondence: c.hawkins@latrobe.edu.au

Received: 07 December 2020

Accepted: 20 January 2021

Published: date

**Publisher's Note:** MDPI stays neutral with regard to jurisdictional claims in published maps and institutional affiliations.

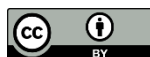

**Copyright:** © 2021 by the authors. Submitted for possible open access publication under the terms and conditions of the Creative Commons Attribution (CC BY) license (<http://creativecommons.org/licenses/by/4.0/>).

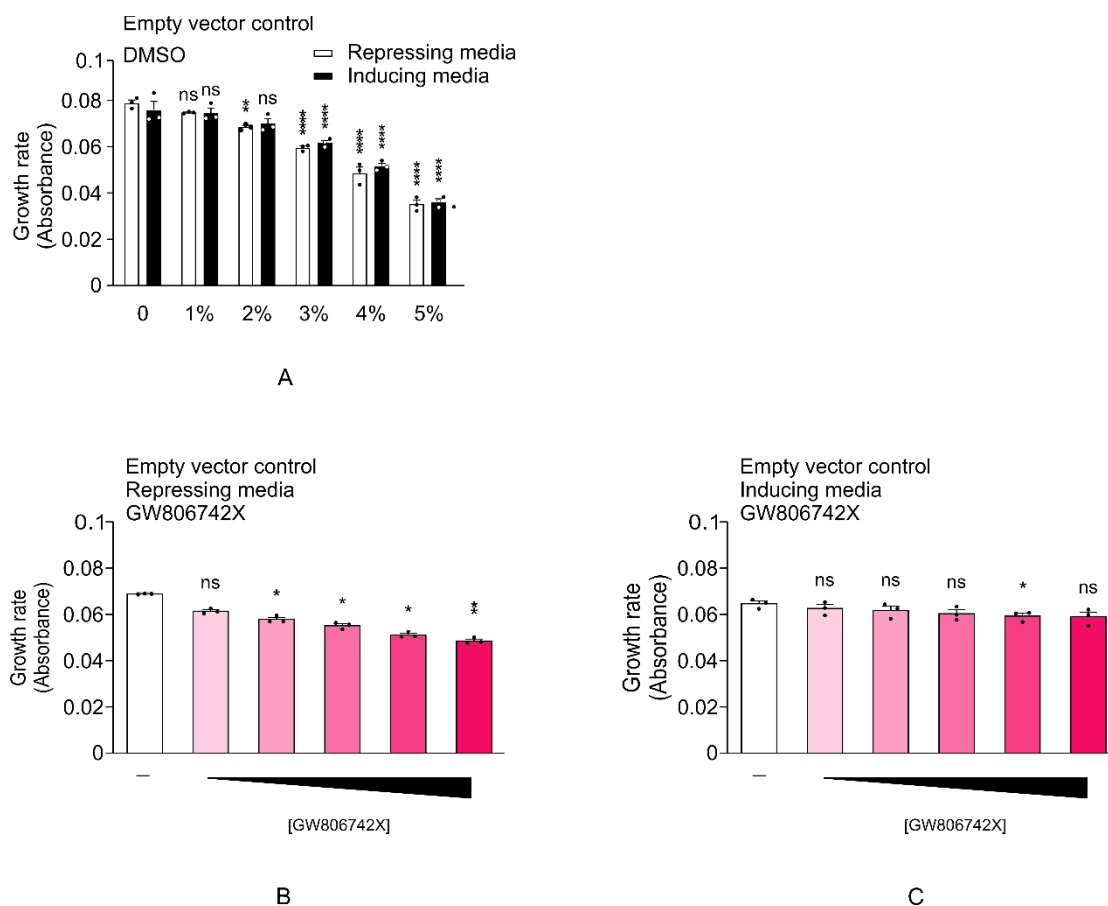

**Figure S1.** Determination of DMSO and GW806742X-mediated yeast toxicity. (A) The inhibitory effects of DMSO on the growth of yeast in liquid media were analyzed by measuring the change in absorbance of yeast cultures in inducing or repressing media with different concentrations of DMSO. Differences in growth rates of empty vector yeast in media without DMSO and those expressing in liquid media the indicated concentrations of DMSO were compared using ANOVAs with Sidak corrections. Maximal growth rate of yeast bearing empty vectors were measured by absorbance of yeast culture grown in inducing (B) or repressing (C) media with different concentrations of GW806742X. Differences in growth rates of yeast in media either without drugs (-) or containing 20, 40, 60, 80 or 100  $\mu$ M of GW806742X were compared using ANOVAs with Sidak corrections. Data present mean  $\pm$  SEM of three independent assays. Statistical analysis of differences in growth rates were indicated in the figures. \*,  $P < 0.05$ ; \*\*,  $P < 0.01$ ; \*\*\*,  $P < 0.001$ ; \*\*\*\*,  $P < 0.0001$ ; ns, not significant..
